# Supplementary material
Source: Springer Nature journal article supplement (https://www.springermedizin.de/resource/supplementary/12889_2012_5657_MOESM3_ESM.pdf/9495896)
Supplement: MOESM3 [file 9495896]

### HYPOTHESIS 1

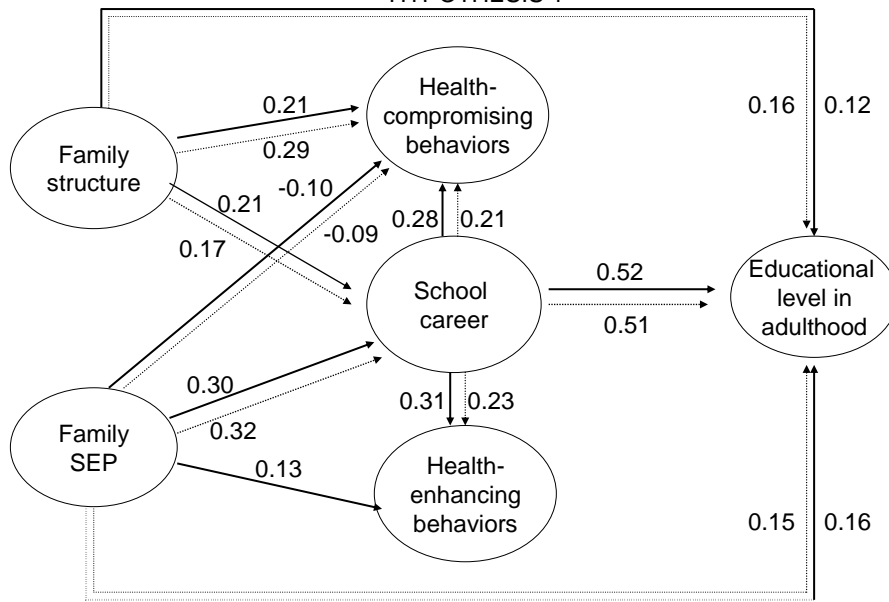

— Boys aged 12 and 14, RMSEA=0.058

⋯ Girls aged 12 and 14, RMSEA=0.064

### HYPOTHESIS 2

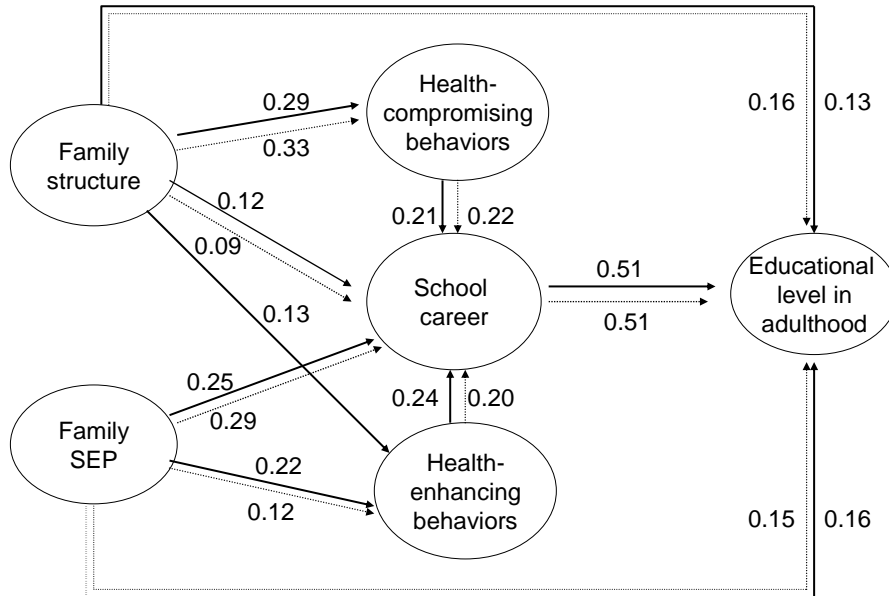

— Boys aged 12 and 14, RMSEA=0.060

⋯ Girls aged 12 and 14, RMSEA=0.062
